# Supplementary material for: Range-Wide Sex-Chromosome Sequence Similarity Supports Occasional XY Recombination in European Tree Frogs (Hyla arborea)
Source: PLoS One. 2014 Jun 3;9(6):e97959. doi: 10.1371/journal.pone.0097959 (PMC4043726; doi:10.1371/journal.pone.0097959)
Supplement: Table S1 — Detailed sample information, including origin, nature, sex, number of clones sequenced and GenBank accession numbers (provided upon acceptance of the paper). (XLSX) [file pone.0097959.s001.xlsx]

## Sheet: Feuil1
ID	Sex	sample*	LocID	Country	Locality	Lat	Long	collector/voucher	Med15 (a,b)	Ha-A103 (a,b)	Smarcb1 (a,b)
1-♀1	F	live adult	1	Greece	Crete, Lasithy Plateau	35.1897	25.4557	C. Dufresnes, J. Wassef	KJ790057 (4 cl.), KJ790058 (8 cl.)		KJ789987 (3 cl.), KJ789988 (12 cl.)
1-♀2	F	live adult	1	Greece	Crete, Lasithy Plateau	35.1897	25.4557	C. Dufresnes, J. Wassef		KJ790015 (4 cl.), KJ790016 (4 cl.)
1-♂1	M	live adult	1	Greece	Crete, Lasithy Plateau	35.1897	25.4557	C. Dufresnes, J. Wassef			KJ789989 (3 cl.), KJ789990 (9 cl.)
1-♂2	M	live adult	1	Greece	Crete, Lasithy Plateau	35.1897	25.4557	C. Dufresnes, J. Wassef	KJ790059 (6 cl.), KJ790060 (5 cl.)
1-♂3	M	live adult	1	Greece	Crete, Lasithy Plateau	35.1897	25.4557	C. Dufresnes, J. Wassef	KJ790061 (10 cl.), KJ790062 (4 cl.)
1-♂4	M	live adult	1	Greece	Crete, Lasithy Plateau	35.1897	25.4557	C. Dufresnes, J. Wassef		KJ790017 (6 cl.), KJ790018 (2 cl.)
2-♂1	M	adult specimen	2	Greece	Peloponese, E bank of Stymphalian lake, Kiónia	37.85	22.45	NME902/01	KJ790063 (7 cl.), KJ790064 (6 cl.)	JF318144 (3 cl.), JF318145 (5 cl.)
3-♂1	M	live adult	3	Greece	Peloponese, Strofylia forest	38.1292	21.3843	C. Dufresnes, B. Pasteur		KJ790019 (5 cl.), KJ790020 (3 cl.)
3-♂2	M	live adult	3	Greece	Peloponese, Strofylia forest	38.1292	21.3843	C. Dufresnes, B. Pasteur	KJ790065 (7 cl.), KJ790066 (5 cl.)
3-♂3	M	live adult	3	Greece	Peloponese, Strofylia forest	38.1292	21.3843	C. Dufresnes, B. Pasteur	KJ790067 (8 cl.), KJ790068 (3 cl.)
4-♀1	F	live adult	4	Greece	W-Greece, Valti	38.4426	21.1251	M. Stöck	KJ790069 (2 cl.), KJ790070 (3 cl.)	KJ790021 (5 cl.), KJ790022 (3 cl.)	KJ789991 (12 cl.)
4-♂1	M	live adult	4	Greece	W-Greece, Valti	38.4426	21.1251	M. Stöck			KJ789992 (7 cl.), KJ789993 (5 cl.)
5-♀1	F	live adult	5	Greece	Evia, Dystos lake	38.3194	24.139	C. Dufresnes, J. Wassef	KJ790071 (6 cl.), KJ790072 (1 cl.)
5-♂1	M	live adult	5	Greece	Evia, Dystos lake	38.3194	24.139	C. Dufresnes, J. Wassef		KJ790023 (8 cl.)
5-♂2	M	live adult	5	Greece	Evia, Dystos lake	38.3194	24.139	C. Dufresnes, J. Wassef	KJ790073 (4 cl.), KJ790074 (4 cl.)
5-♂3	M	live adult	5	Greece	Evia, Dystos lake	38.3194	24.139	C. Dufresnes, J. Wassef	KJ790075 (5 cl.), KJ790076 (7 cl.)
6-♀1	F	live adult	6	Greece	Macedonia, Chalkidona	40.722	22.6671	R. Savary, B. Pasteur		KJ790024 (6 cl.)
6-♀2	F	live adult	6	Greece	Macedonia, Chalkidona	40.722	22.6671	R. Savary, B. Pasteur	KJ790077 (5 cl.), KJ790078 (8 cl.)		KJ789994 (4 cl.), KJ789995 (8 cl.)
6-♂1	M	live adult	6	Greece	Macedonia, Chalkidona	40.722	22.6671	R. Savary, B. Pasteur	KJ790079 (3 cl.), KJ790080 (2 cl.)
6-♂2	M	live adult	6	Greece	Macedonia, Chalkidona	40.722	22.6671	R. Savary, B. Pasteur	KJ790081 (3 cl.), KJ790082 (5 cl.)		KJ789996 (7 cl.), KJ789997 (4 cl.)
7-♀1	F	live adult	7	Serbia	Central Serbia, Prohor Pcjinska	42.3288	21.8964	C. Dufresnes, N. Preradovic		KJ790025 (8 cl.)
7-♂1	M	live adult	7	Serbia	Central Serbia, Prohor Pcjinska	42.3288	21.8964	C. Dufresnes, N. Preradovic		KJ790026 (8 cl.)
8-♂1	M	live adult	8	Croatia	Dubrovnik-Neretva, Konavle	42.5271	18.351	C. Dufresnes, B. Pasteur	KJ790083 (6 cl.), KJ790084 (6 cl.)
8-♂2	M	live adult	8	Croatia	Dubrovnik-Neretva, Konavle	42.5271	18.351	C. Dufresnes, B. Pasteur		KJ790027 (3 cl.), KJ790028 (5 cl.)
9-♀1	F	live adult	9	Croatia	Zadar, Vransko lake	43.9405	15.5221	C. Dufresnes, J. Wassef, B. Pasteur		KJ790029 (8 cl.)	KJ789998 (11 cl.)
9-♀2	F	live adult	9	Croatia	Zadar, Vransko lake	43.9405	15.5221	C. Dufresnes, J. Wassef, B. Pasteur	KJ790085 (3 cl.), KJ790086 (8 cl.)
9-♂1	M	live adult	9	Croatia	Zadar, Vransko lake	43.9405	15.5221	C. Dufresnes, J. Wassef, B. Pasteur			KJ789999 (6 cl.), KJ790000 (6 cl.)
9-♂2	M	live adult	9	Croatia	Zadar, Vransko lake	43.9405	15.5221	C. Dufresnes, J. Wassef, B. Pasteur	KJ790087 (7 cl.), KJ790088 (4 cl.)
9-♂3	M	live adult	9	Croatia	Zadar, Vransko lake	43.9405	15.5221	C. Dufresnes, J. Wassef, B. Pasteur		KJ790030 (8 cl.)
10-♀1	F	adult specimen	10	Croatia	Insel Cres, Osor, pond near transformation plant	44.69	14.39	NME674/00	KJ790089 (4 cl.), KJ790090 (2 cl.)
11-♂1	M	adult specimen	11	Croatia	Insel Cres, Hrasta, Salix row near the village	44.81	14.41	NME676/00	KJ790091 (4 cl.), KJ790092 (5 cl.)
12-♂1	M	live adult	12	Croatia	Krk island	45.1747	14.5593	M. Stöck		JF318154 (3 cl.), JF318155 (4 cl.)
13-♀1	F	live adult	13	Croatia	Krk island, Cizici	45.1704	14.6229	C. Dufresnes, J. Wassef, B. Pasteur			KJ790001 (3 cl.), KJ790002 (8 cl.)
13-♀2	F	live adult	13	Croatia	Krk island, Cizici	45.1704	14.6229	C. Dufresnes, J. Wassef, B. Pasteur	KJ790093 (10 cl.), KJ790094 (3 cl.)	KJ790031 (7 cl.)
13-♂1	M	live adult	13	Croatia	Krk island, Cizici	45.1704	14.6229	C. Dufresnes, J. Wassef, B. Pasteur			KJ790003 (4 cl.), KJ790004 (8 cl.)
13-♂2	M	live adult	13	Croatia	Krk island, Cizici	45.1704	14.6229	C. Dufresnes, J. Wassef, B. Pasteur	KJ790095 (8 cl.)	KJ790032 (3 cl.), KJ790033 (3 cl.)
14-♀1	F	live adult	14	Croatia	Istria, Motovun	45.3405	13.8101	K. Ghali, Y. Bertholet, J. Wassef, S. Antonazzia	KJ790096 (5 cl.), KJ790097 (4 cl.)
14-♀2	F	live adult	14	Croatia	Istria, Motovun	45.3405	13.8101	K. Ghali, Y. Bertholet, J. Wassef, S. Antonazzia	KJ790098 (3 cl.), -
14-♀3	F	live adult	14	Croatia	Istria, Motovun	45.3405	13.8101	K. Ghali, Y. Bertholet, J. Wassef, S. Antonazzia		KJ790034 (6 cl.), KJ790035 (2 cl.)
14-♂1	M	live adult	14	Croatia	Istria, Motovun	45.3405	13.8101	K. Ghali, Y. Bertholet, J. Wassef, S. Antonazzia		KJ790036 (8 cl.)
14-♂2	M	live adult	14	Croatia	Istria, Motovun	45.3405	13.8101	K. Ghali, Y. Bertholet, J. Wassef, S. Antonazzia	KJ790099 (3 cl.), -
14-♂3	M	live adult	14	Croatia	Istria, Motovun	45.3405	13.8101	K. Ghali, Y. Bertholet, J. Wassef, S. Antonazzia	KJ790100 (4 cl.), KJ790101 (8 cl.)
15-♀1	F	live adult	15	Croatia	Karlovac, Kupa Kupa canal	45.5435	15.5729	C. Dufresnes, I. Henry, Y. Bertholet, S. Antonazzia	KJ790102 (3 cl.), KJ790103 (5 cl.)
15-♂1	M	live adult	15	Croatia	Karlovac, Kupa Kupa canal	45.5435	15.5729	C. Dufresnes, I. Henry, Y. Bertholet, S. Antonazzia	KJ790104 (8 cl.), KJ790105 (6 cl.)	KJ790037 (2 cl.), KJ790038 (6 cl.)
15-♂2	M	live adult	15	Croatia	Karlovac, Kupa Kupa canal	45.5435	15.5729	C. Dufresnes, I. Henry, Y. Bertholet, S. Antonazzia		KJ790039 (6 cl.), KJ790040 (2 cl.)
16-♀1	F	live adult	16	Serbia	Vojvodina, Bojcinska forest	44.7422	20.1382	C. Dufresnes, J. Wassef, K. Ghali	KJ790106 (5 cl.), KJ790107 (7 cl.)
16-♀2	F	live adult	16	Serbia	Vojvodina, Bojcinska forest	44.7422	20.1382	C. Dufresnes, J. Wassef, K. Ghali	KJ790108 (7 cl.)		KJ790005 (7 cl.), KJ790006 (5 cl.)
16-♀3	F	live adult	16	Serbia	Vojvodina, Bojcinska forest	44.7422	20.1382	C. Dufresnes, J. Wassef, K. Ghali	KJ790109 (6 cl.), KJ790110 (5 cl.)
16-♀4	F	live adult	16	Serbia	Vojvodina, Bojcinska forest	44.7422	20.1382	C. Dufresnes, J. Wassef, K. Ghali		KJ790041 (5 cl.), KJ790042 (3 cl.)
16-♀5	F	live adult	16	Serbia	Vojvodina, Bojcinska forest	44.7422	20.1382	C. Dufresnes, J. Wassef, K. Ghali		KJ790043 (7 cl.)
16-♂1	M	live adult	16	Serbia	Vojvodina, Bojcinska forest	44.7422	20.1382	C. Dufresnes, J. Wassef, K. Ghali		KJ790044 (4 cl.), KJ790045 (3 cl.)
16-♂2	M	live adult	16	Serbia	Vojvodina, Bojcinska forest	44.7422	20.1382	C. Dufresnes, J. Wassef, K. Ghali			KJ790007 (2 cl.), KJ790008 (9 cl.)
16-♂3	M	live adult	16	Serbia	Vojvodina, Bojcinska forest	44.7422	20.1382	C. Dufresnes, J. Wassef, K. Ghali	KJ790111 (11 cl.), KJ790112 (5 cl.)
17-♂1	M	live adult	17	Romania	Mures, Chinari	46.6222	24.6019	C. Dufresnes, Y. Bertholet	KJ790113 (5 cl.), KJ790114 (6 cl.)
17-♂2	M	live adult	17	Romania	Mures, Chinari	46.6222	24.6019	C. Dufresnes, Y. Bertholet	KJ790115 (2 cl.), KJ790116 (2 cl.)
18-♀1	F	live adult	18	Hungary	Pest, Dömsöd	47.1311	18.9987	C. Dufresnes, Y. Bertholet	KJ790117 (3 cl.), KJ790118 (5 cl.)	KJ790046 (8 cl.)
18-♂1	M	live adult	18	Hungary	Pest, Dömsöd	47.1311	18.9987	C. Dufresnes, Y. Bertholet	KJ790119 (2 cl.), KJ790120 (6 cl.)	KJ790047 (8 cl.)
18-♂2	M	live adult	18	Hungary	Pest, Dömsöd	47.1311	18.9987	C. Dufresnes, Y. Bertholet		KJ790048 (6 cl.), KJ790049 (2 cl.)
19-♀1	F	live adult	19	Austria	Burgenland, Neusiedler See	47.9261	16.8634	C. Dufresnes, Y. Bertholet, J. Wassef, K. Ghali		KJ790050 (5 cl.), KJ790051 (3 cl.)
19-♀2	F	live adult	19	Austria	Burgenland, Neusiedler See	47.9261	16.8634	C. Dufresnes, Y. Bertholet, J. Wassef, K. Ghali	KJ790121 (2 cl.), KJ790122 (7 cl.)
19-♂1	M	live adult	19	Austria	Burgenland, Neusiedler See	47.9261	16.8634	C. Dufresnes, Y. Bertholet, J. Wassef, K. Ghali	KJ790123 (4 cl.), KJ790124 (5 cl.)
19-♂2	M	live adult	19	Austria	Burgenland, Neusiedler See	47.9261	16.8634	C. Dufresnes, Y. Bertholet, J. Wassef, K. Ghali		KJ790052 (7 cl.)
19-♂3	M	live adult	19	Austria	Burgenland, Neusiedler See	47.9261	16.8634	C. Dufresnes, Y. Bertholet, J. Wassef, K. Ghali		KJ790053 (7 cl.)
19-♂4	M	live adult	19	Austria	Burgenland, Neusiedler See	47.9261	16.8634	C. Dufresnes, Y. Bertholet, J. Wassef, K. Ghali	KJ790125 (4 cl.), KJ790126 (2 cl.)
20-♂1	M	live adult	20	Poland	Niezgoda	51.5153	17.0508	M. Ogielska		KJ790054 (8 cl.)
21-♀1	F	live adult	21	Germany	Thüringen, TÜP Egstedt, Erfurt	50.9235	11.0688	S. Rading	KJ790129 (6 cl.)
21-♂1	M	live adult	21	Germany	Thüringen, TÜP Egstedt, Erfurt	50.9235	11.0688	S. Rading	KJ790127 (4 cl.), KJ790128 (2 cl.)
22-♂1	M	adult specimen	22	Germany	NRW, near Münster	51.95	7.7	NME1228/4	KJ790130 (2 cl.), KJ790131 (3 cl.)
23-♂1	M	live adult	23	Netherlands	Lochem, Barchem	52.1159	6.47748	R. Zollinger		KJ790055 (7 cl.), KJ790056 (1 cl.)
24-♀1	F	live adult	24	Switzerland	Zürich, Flaach	47.582	8.60201	O. Blaser, C. Grossen	KJ790134 (9 cl.)
24-♀2	F	live adult	24	Switzerland	Zürich, Flaach	47.582	8.60201	O. Blaser, C. Grossen	KJ790135 (9 cl.), KJ790136 (3 cl.)
24-♂1	M	live adult	24	Switzerland	Zürich, Flaach	47.582	8.60201	O. Blaser, C. Grossen			KJ790009, KJ790010
24-♂2	M	live adult	24	Switzerland	Zürich, Flaach	47.582	8.60201	O. Blaser, C. Grossen			KJ790011, KJ790012
24-♂3	M	live adult	24	Switzerland	Zürich, Flaach	47.582	8.60201	O. Blaser, C. Grossen	KJ790132 (4 cl.), KJ790133 (6 cl.)
25-♀1	F	live adult	25	Switzerland	Vaud, Lavigny	46.5025	6.41958	-			KJ790013
25-♀2	F	live adult	25	Switzerland	Vaud, Lavigny	46.5025	6.41958	-			KJ790014
25-♀3	F	live adult	25	Switzerland	Vaud, Lavigny	46.5025	6.41958	Z. Dumas, R. Sermier		JF318156 (2 cl.), JF318157 (6 cl.)
25-♂1	M	live adult	25	Switzerland	Vaud, Lavigny	46.5025	6.41958	Z. Dumas, R. Sermier		JF318146 (12 cl.)
25-♂2	M	live adult	25	Switzerland	Vaud, Lavigny	46.5025	6.41958	Z. Dumas, R. Sermier		JF318147 (12 cl.)
25-♂3	M	live adult	25	Switzerland	Vaud, Lavigny	46.5025	6.41958	J. Jaquiéry, T. Broquet	JF317990 (5 cl.), JF317989 (5 cl.)
26-♀1	F	live adult	26	France	Savoie, Laissaud	45.4706	6.06304	E. Luquet	KJ790137 (12 cl.)
26-♂1	M	live adult	26	France	Savoie, Laissaud	45.4706	6.06304	E. Luquet	JF317992 (4 cl.), JF317993 (4 cl.)
27-♀1	F	live adult	27	France	Isère, Le Cheylas	45.3984	5.99639	C. Dufresnes	JF317996 (9 cl.), JF317995 (7 cl.)
27-♀2	F	live adult	27	France	Isère, Le Cheylas	45.3984	5.99639	C. Dufresnes	JF317991 (10 cl.)
27-♂1	M	live adult	27	France	Isère, Le Cheylas	45.3984	5.99639	C. Dufresnes	JF317997 (8 cl.), JF317994 (5 cl.)
28-♀1	F	live adult	28	France	Ain, Villars-les-Dombes	45.9595	5.0434	E. Luquet	KJ790138 (6 cl.), KJ790139 (1 cl.)
29-♀1	F	live adult	29	France	La Bassée	48.4333	3.28349	-	KJ790140 (7 cl.)
29-♂1	M	live adult	29	France	La Bassée	48.4333	3.28349	-	KJ790141 (3 cl.), KJ790142 (3 cl.)
30-♀1	F	live adult	30	France	Fontainebleau	48.4076	2.64	-	KJ790143 (2 cl.), KJ790144 (3 cl.)
30-♀2	F	live adult	30	France	Fontainebleau	48.4076	2.64	-	KJ790145 (2 cl.), KJ790146 (3 cl.)
30-♂1	M	live adult	30	France	Fontainebleau	48.4076	2.64	-	KJ790148 (5 cl.), KJ790147 (10 cl.)
*all live adults were phenotipically sexed based on secondary sexual characters, very distinctive during the breeding period; museum specimen were sexed anatomically (see main text)
